# Supplementary material for: Densified low-hygroscopic form of P2O5 glass
Source: Royal Society of Chemistry journal article supplement (doi:10.1039/c1jm10889a), 2011-01-01

Results of reverse Monte Carlo (RMC) simulations for the normal pressure (black lines) and high-pressure (HP) quenched (7 GPa) (red lines)  $P_2O_5$  glasses.

$O_t$  - terminal oxygen atoms;  $O_b$  - bridging oxygen atoms

1) Partial interference functions (structure factors)

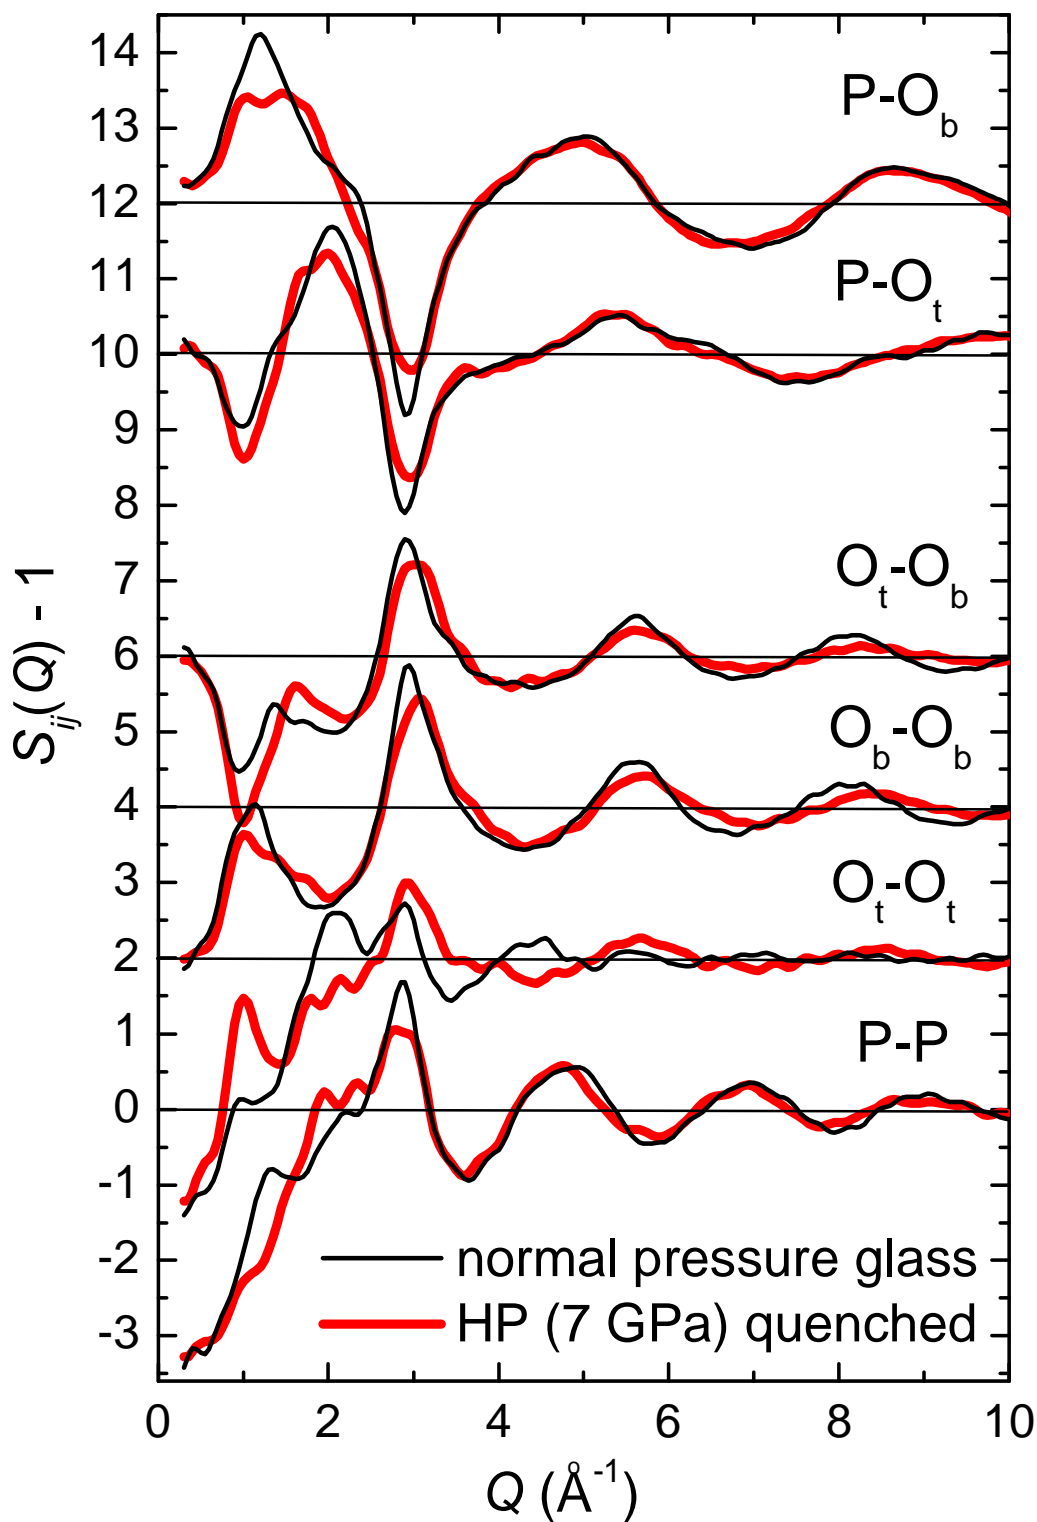

## 2) Partial pair distribution functions

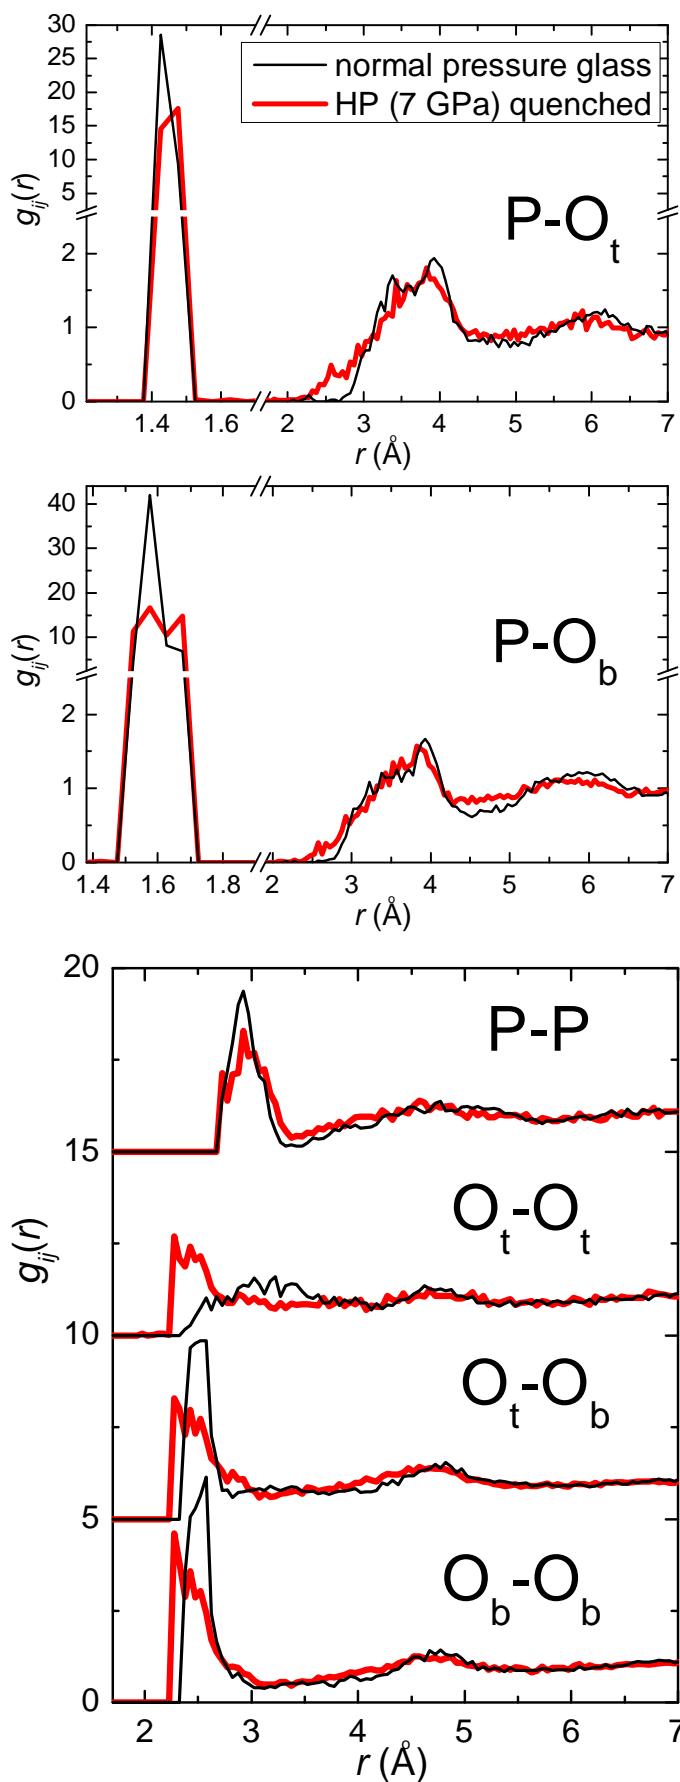

### 3) Bond-angle distributions

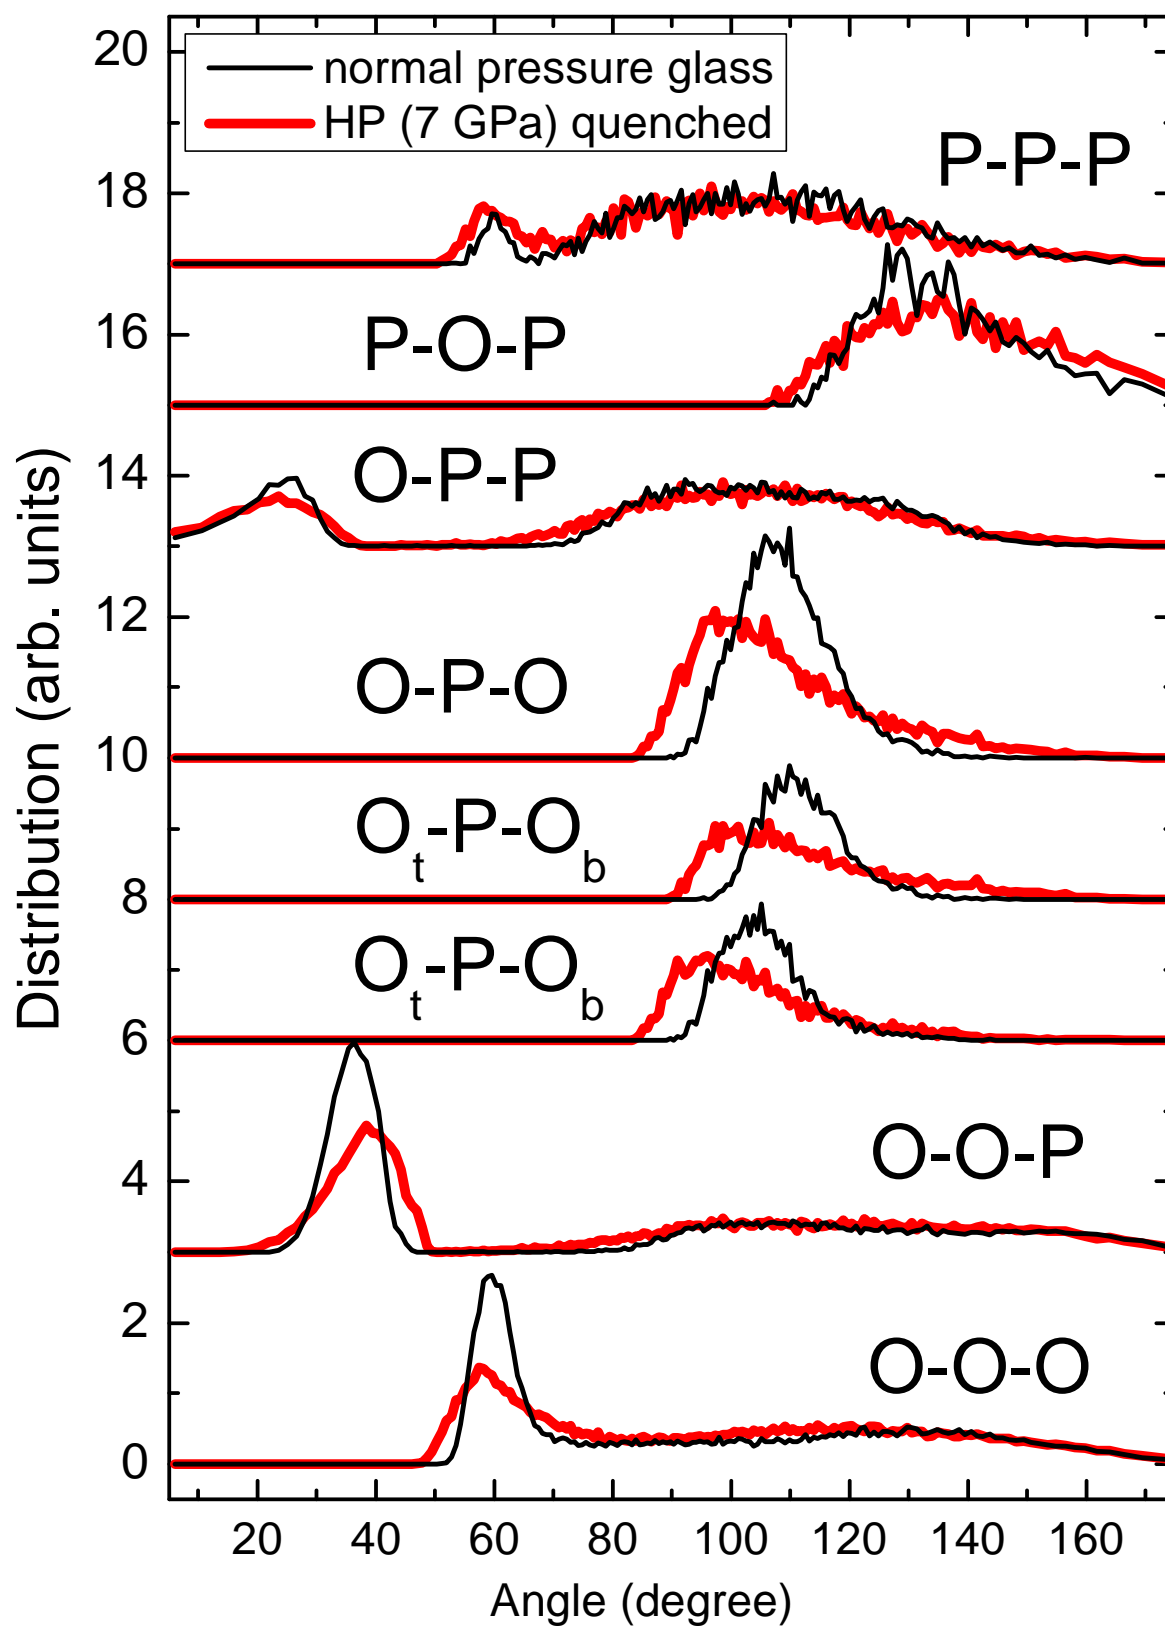

Supplement: c1jm10889a.pdf [file c1jm10889a.pdf]
